## Correction: Characteristic analysis of TCR $\beta$ -chain CDR3 repertoire for preand post-liver transplantation

Guiqi Yang<sup>1,\*</sup>, Minglin Ou<sup>1,2,\*</sup>, Huaizhou Chen<sup>1</sup>, Changchun Guo<sup>3</sup>, Jiejing Chen<sup>1</sup>, Hua Lin<sup>1</sup>, Donge Tang<sup>2</sup>, Wen Xue<sup>1</sup>, Wenlong Li<sup>4</sup>, Weiguo Sui<sup>1</sup> and Yong Dai<sup>2</sup>

<sup>1</sup>Guangxi Key laboratory of Metabolic Diseases Research, Central Laboratory of Guilin No. 181 Hospital, Guilin 541002, Guangxi, P.R. China

<sup>2</sup>Clinical Medical Research Center, The Second Clinical Medical College of Jinan University, Shenzhen, Guangdong 518020, P.R. China

<sup>3</sup>The Pingshan People's Hospital of Shenzhen, Shenzhen, Guangdong 518118, P.R. China

<sup>4</sup>The Technology Company of iCarbonX, Shenzhen, Guangdong 518000, P.R. China

\*These authors contributed equally to this work

**Published:** May 05, 2020

**Copyright:** Yang et al. This is an open-access article distributed under the terms of the Creative Commons Attribution License 3.0 (CC BY 3.0), which permits unrestricted use, distribution, and reproduction in any medium, provided the original author and source are credited.

**This article has been corrected:** The 1st affiliation information was presented incorrectly. The proper affiliation 1 is as follows:

<sup>1</sup>Guangxi Key laboratory of Metabolic Diseases Research, Central Laboratory of Guilin No. 181 Hospital, Guilin 541002, Guangxi, P.R. China

Original article: Oncotarget. 2018; 9:34506–34519. <https://doi.org/10.18632/oncotarget.26138>
